# Supplementary material for: HSA functionalized Gd2O3:Eu3+ nanoparticles as an MRI contrast agent and a potential luminescent probe for Fe3+, Cr3+, and Cu2+ detection in water
Source: Royal Society of Chemistry journal article supplement (doi:10.1039/d0nj02960b), 2020-01-01
Supplement: d0nj02960b1.pdf [file d0nj02960b1.pdf]

## Supporting Information

### HAS functionalized Gd<sub>2</sub>O<sub>3</sub>:Eu<sup>3+</sup> nanoparticles as MRI contrast agent and potential luminescent probe for detection of Fe<sup>3+</sup>, Cr<sup>3+</sup>, Cu<sup>2+</sup> in water

Nidhi Vashistha,<sup>a</sup> Abhishek Chandra,<sup>a</sup> and Man Singh<sup>\*a</sup>

**Table S1.** Specifications of chemicals used.

| Name of Chemicals                         | Purity <sup>a</sup> | Source         | CAS No.    |
|-------------------------------------------|---------------------|----------------|------------|
| Gadolinium(III) Nitrate Hexahydrate       | 99.9 %              | Sigma-Aldrich  | 19598-90-4 |
| Europium(III) Nitrate Hexahydrate         | 99.9 %              | Sigma- Aldrich | 10031-53-5 |
| Urea                                      | AR                  | Rankem         | 57-13-6    |
| Polyvinylpyrrolidone (PVP)                | 99.9 %              | Sigma-Aldrich  | 9003-39-8  |
| Human Serum Albumin                       | 97%                 | Sigma-Aldrich  | A9511      |
| Sodium Hydroxide                          | AR                  | Rankem         | 1310-73-2  |
| Ferric Chloride                           | AR                  | Rankem         | 7705-08-0  |
| Ferrous Chloride                          | AR                  | Rankem         | 7758-94-3  |
| Chromium Chloride                         | AR                  | Rankem         | 10025-73-7 |
| Cupric Chloride                           | AR                  | Rankem         | 7447-39-4  |
| Zinc Chloride                             | AR                  | Rankem         | 7646-85-7  |
| Manganese Chloride                        | AR                  | Rankem         | 13446-34-9 |
| Lead Acetate                              | AR                  | Rankem         | 6080-56-4  |
| Nickel Chloride                           | AR                  | Rankem         | 7718-54-9  |
| Cobalt Chloride                           | AR                  | Rankem         | 7646-79-9  |
| Cadmium Chloride                          | AR                  | Rankem         | 10108-64-2 |
| Calcium Chloride                          | AR                  | Rankem         | 10043-52-4 |
| Sodium Chloride                           | AR                  | Rankem         | 7647-14-5  |
| Potassium Chloride                        | AR                  | Rankem         | 7447-40-7  |
| Mercuric Chloride                         | AR                  | Rankem         | 7487-94-7  |
| Magnesium Chloride                        | 99%                 | Sigma-Aldrich  | M9272      |
| Aluminium Chloride                        | 99.99%              | Sigma-Aldrich  | 294713     |
| RPMI-1640 Medium                          | -                   | Sigma-Aldrich  | R0883      |
| Dulbecco's Modified Eagle's Medium (DMEM) | -                   | Sigma-Aldrich  | D6046      |

<sup>a</sup>purity as provided by suppliers

A.R. = Analytical grade

**Table S2** Thermodynamic decomposition parameters of PVP@Gd<sub>2</sub>O<sub>3</sub>:Eu<sup>3+</sup> NPs calculated from TGA/DTA data.

Thermodynamic Parameters PVP@Gd<sub>2</sub>O<sub>3</sub>:Eu<sup>3+</sup>  
<sup>a</sup> School of Chemical Sciences, Central University of Gujarat, Gandhinagar-382030, India  
Email: \*mansingh50@hotmail.com

|                                |          |
|--------------------------------|----------|
| E (KJ·mol <sup>-1</sup> )      | 75.2578  |
| A(min <sup>-1</sup> )          | 51.5160  |
| ΔS (KJ· mole <sup>-1</sup> ·K) | -0.2181  |
| ΔH (KJ·mol <sup>-1</sup> )     | -4.9560  |
| ΔG (KJ·mol <sup>-1</sup> )     | 127.0019 |

**Table S3.** Particle size distribution and zeta potential of PVP@Gd<sub>2</sub>O<sub>3</sub>:Eu<sup>3+</sup> NPs and HSA@PVP@Gd<sub>2</sub>O<sub>3</sub>:Eu<sup>3+</sup> NPs dispersed in different aqueous mediums.

| Nanoparticles                                             |          | Diameter (nm) | Volume % | width   | Zeta Potential (mv) |
|-----------------------------------------------------------|----------|---------------|----------|---------|---------------------|
| <b>Aqueous dispersed nanoparticles</b>                    |          |               |          |         |                     |
| PVP@Gd <sub>2</sub> O <sub>3</sub> :Eu <sup>3+</sup>      |          | 106.40        | 100.00   | 78.50   | 25.39               |
| HSA@PVP@Gd <sub>2</sub> O <sub>3</sub> :Eu <sup>3+</sup>  |          | 144.90        | 100.00   | 78.00   | 48.22               |
| <b>At varied pH</b>                                       |          |               |          |         |                     |
| PVP@Gd <sub>2</sub> O <sub>3</sub> :Eu <sup>3+</sup>      | pH 3     | 11.99         | 100.00   | 26.55   | 61.51               |
|                                                           | pH 12    | 136.50        | 100.00   | 97.70   | -25.41              |
| HSA@PVP@Gd <sub>2</sub> O <sub>3</sub> :Eu <sup>3+</sup>  | pH 3     | 3510.00       | 21.10    | 523.00  | 50.09               |
|                                                           |          | 148.40        | 13.90    | 2939.00 |                     |
|                                                           |          | 31.70         | 65.00    | 18.18   |                     |
|                                                           | pH 12    | 767.00        | 4.50     | 221.40  | -31.84              |
|                                                           |          | 193.70        | 95.50    | 125.30  |                     |
| <b>with 7 mM NaCl concentration</b>                       |          |               |          |         |                     |
| PVP@Gd <sub>2</sub> O <sub>3</sub> :Eu <sup>3+</sup>      |          | 124.80        | 100.00   | 173.00  | 22.12               |
| HSA@PVP@Gd <sub>2</sub> O <sub>3</sub> :Eu <sup>3+</sup>  |          | 167.40        | 100.00   | 100.90  | 45.97               |
| <b>With 20 mM Surfactant</b>                              |          |               |          |         |                     |
| PVP@Gd <sub>2</sub> O <sub>3</sub> :Eu <sup>3+</sup>      | DTAB     | 6000.00       | 3.60     | 637.00  | 16.20               |
|                                                           |          | 162.20        | 39.00    | 105.40  |                     |
|                                                           |          | 5.64          | 57.40    | 3.69    |                     |
|                                                           | SDS      | 245.70        | 26.40    | 203.80  | 7.25                |
|                                                           |          | 14.98         | 73.60    | 3.40    |                     |
|                                                           | Tween 20 | 1073          | 1.60     | 200.00  | 25.75               |
| 175.90                                                    |          | 98.40         | 112.20   |         |                     |
| HSA@PVP@Gd <sub>2</sub> O <sub>3</sub> :Eu <sup>3+</sup>  | DTAB     | 193.20        | 100.00   | 256.90  | 11.20               |
|                                                           | SDS      | 182.60        | 100.00   | 202.00  | 28.98               |
|                                                           | Tween 20 | 767.00        | 4.50     | 221.40  | 30.59               |
|                                                           |          | 193.70        | 95.50    | 125.30  |                     |
| <b>With DMEM (Biological media)</b>                       |          |               |          |         |                     |
| PVP@Gd <sub>2</sub> O <sub>3</sub> :Eu <sup>3+</sup>      | 24 h     | 191.50        | 100.00   | 133.20  | 20.30               |
|                                                           | 48 h     | 188.60        | 100.00   | 112.20  | 18.07               |
| PVP@Gd <sub>2</sub> O <sub>3</sub> :Eu <sup>3+</sup> -HSA | 24 h     | 145.30        | 100.00   | 131.00  | 65.63               |
|                                                           | 48 h     | 143.40        | 100.00   | 116.90  | 58.94               |
| <b>With RPMI (Biological media)</b>                       |          |               |          |         |                     |
| PVP@Gd <sub>2</sub> O <sub>3</sub> :Eu <sup>3+</sup>      | 24 h     | 194.40        | 100.00   | 155.60  | 19.31               |
|                                                           | 48 h     | 201.10        | 100.00   | 138.70  | 17.67               |

|                                                           |      |        |        |        |       |
|-----------------------------------------------------------|------|--------|--------|--------|-------|
| PVP@Gd <sub>2</sub> O <sub>3</sub> :Eu <sup>3+</sup> -HSA | 24 h | 146.40 | 100.00 | 106.90 | 48.02 |
|                                                           | 48 h | 143.50 | 100.00 | 98.10  | 48.08 |

**Table S4.** Stern-Volmer parameters for different metal ions with PVP@Gd<sub>2</sub>O<sub>3</sub>:Eu<sup>3+</sup> NPs and HSA@PVP@Gd<sub>2</sub>O<sub>3</sub>:Eu<sup>3+</sup> NPs.

| Ions                                                                                                                         | K <sub>Q</sub> (M <sup>-1</sup> ) | Intercept | R <sup>2</sup> | Concentration range (M)                      |
|------------------------------------------------------------------------------------------------------------------------------|-----------------------------------|-----------|----------------|----------------------------------------------|
| <b>PVP@Gd<sub>2</sub>O<sub>3</sub>:Eu<sup>3+</sup></b>                                                                       |                                   |           |                |                                              |
| Fe <sup>3+</sup>                                                                                                             | 16594                             | 0.811     | 0.994          | 1.2×10 <sup>-5</sup> to 1.2×10 <sup>-4</sup> |
| <b>PVP@Gd<sub>2</sub>O<sub>3</sub>:Eu<sup>3+</sup> in presence of 3.33 ppm Cu<sup>2+</sup> and Cr<sup>3+</sup> ions</b>      |                                   |           |                |                                              |
| Fe <sup>3+</sup>                                                                                                             | 16593                             | 0.799     | 0.985          | 1.2×10 <sup>-5</sup> to 1.2×10 <sup>-4</sup> |
| <b>HSA@PVP@Gd<sub>2</sub>O<sub>3</sub>:Eu<sup>3+</sup></b>                                                                   |                                   |           |                |                                              |
| Fe <sup>3+</sup>                                                                                                             | 5155                              | 1.161     | 0.995          | 2.7×10 <sup>-6</sup> to 1.1×10 <sup>-4</sup> |
| <b>HSA@PVP@Gd<sub>2</sub>O<sub>3</sub>:Eu<sup>3+</sup> in presence of 0.667 ppm Cu<sup>2+</sup> and Cr<sup>3+</sup> ions</b> |                                   |           |                |                                              |
| Fe <sup>3+</sup>                                                                                                             | 4717                              | 1.194     | 0.985          | 2.7×10 <sup>-6</sup> to 1.1×10 <sup>-4</sup> |
| <b>PVP@Gd<sub>2</sub>O<sub>3</sub>:Eu<sup>3+</sup></b>                                                                       |                                   |           |                |                                              |
| Cr <sup>3+</sup>                                                                                                             | 4354                              | 0.828     | 0.960          | 3.2×10 <sup>-5</sup> to 2.2×10 <sup>-4</sup> |
| <b>PVP@Gd<sub>2</sub>O<sub>3</sub>:Eu<sup>3+</sup> in presence of 3.33 ppm Fe<sup>3+</sup> and Cu<sup>2+</sup> ions</b>      |                                   |           |                |                                              |
| Cr <sup>3+</sup>                                                                                                             | 4434                              | 0.834     | 0.984          | 3.2×10 <sup>-5</sup> to 2.2×10 <sup>-4</sup> |
| <b>HSA@PVP@Gd<sub>2</sub>O<sub>3</sub>:Eu<sup>3+</sup></b>                                                                   |                                   |           |                |                                              |
| Cr <sup>3+</sup>                                                                                                             | 1984                              | 1.159     | 0.979          | 6.3×10 <sup>-6</sup> to 1.9×10 <sup>-4</sup> |
| <b>HSA@PVP@Gd<sub>2</sub>O<sub>3</sub>:Eu<sup>3+</sup> in presence of 0.667 ppm Fe<sup>3+</sup> and Cu<sup>2+</sup> ions</b> |                                   |           |                |                                              |
| Cr <sup>3+</sup>                                                                                                             | 2138                              | 1.145     | 0.993          | 6.3×10 <sup>-6</sup> to 1.9×10 <sup>-4</sup> |
| <b>HSA@PVP@Gd<sub>2</sub>O<sub>3</sub>:Eu<sup>3+</sup></b>                                                                   |                                   |           |                |                                              |
| Cu <sup>2+</sup>                                                                                                             | 1564                              | 1.010     | 0.991          | 5.2×10 <sup>-5</sup> to 2.1×10 <sup>-4</sup> |
| <b>PVP@Gd<sub>2</sub>O<sub>3</sub>:Eu<sup>3+</sup> in presence of 3.33 ppm Fe<sup>3+</sup> and Cr<sup>3+</sup> ions</b>      |                                   |           |                |                                              |
| Cu <sup>2+</sup>                                                                                                             | 1533                              | 1.009     | 0.988          | 5.2×10 <sup>-5</sup> to 2.1×10 <sup>-4</sup> |
| <b>HSA@PVP@Gd<sub>2</sub>O<sub>3</sub>:Eu<sup>3+</sup></b>                                                                   |                                   |           |                |                                              |
| Cu <sup>2+</sup>                                                                                                             | 1011                              | 1.108     | 0.997          | 1.0×10 <sup>-5</sup> to 1.6×10 <sup>-4</sup> |
| <b>HSA@PVP@Gd<sub>2</sub>O<sub>3</sub>:Eu<sup>3+</sup> in presence of 0.667 ppm Fe<sup>3+</sup> and Cr<sup>3+</sup> ions</b> |                                   |           |                |                                              |
| Cu <sup>2+</sup>                                                                                                             | 1079                              | 1.103     | 0.996          | 1.0×10 <sup>-5</sup> to 1.6×10 <sup>-4</sup> |

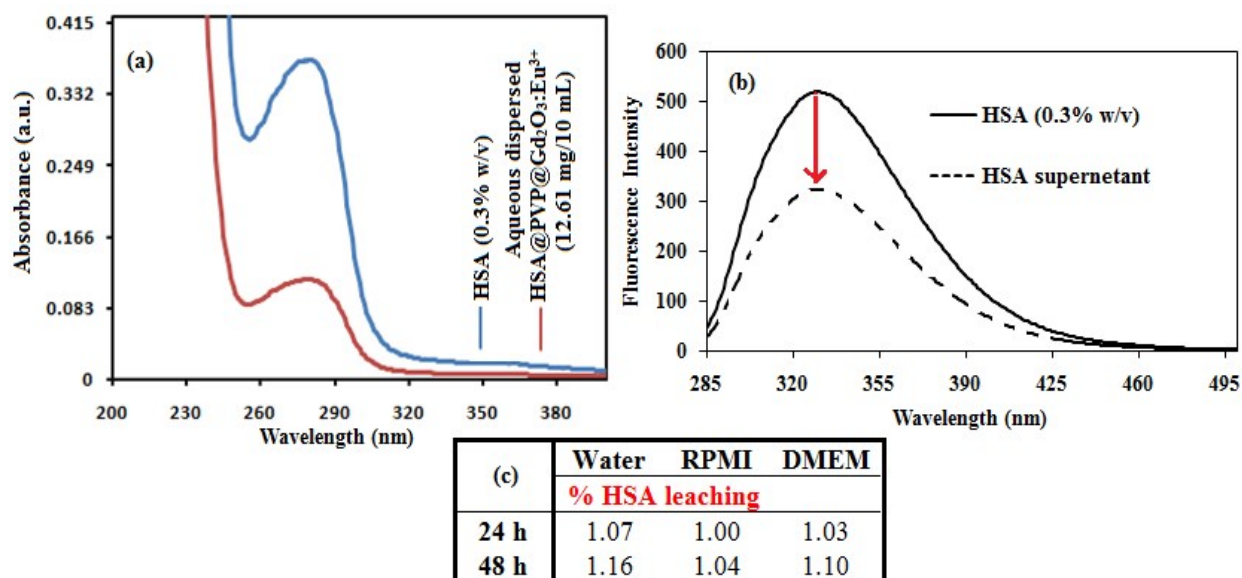

**Figure S1.** (a) UV-Visible absorbance spectra of aq. HSA and aq. dispersed HSA@PVP@Gd<sub>2</sub>O<sub>3</sub>:Eu<sup>3+</sup> NPs (b) fluorescence spectra of HSA supernatant left after PVP@Gd<sub>2</sub>O<sub>3</sub>:Eu<sup>3+</sup> NPs surface functionalization with HSA (c) percent HSA leaching in water and cell culture media (RPMI and DMEM).

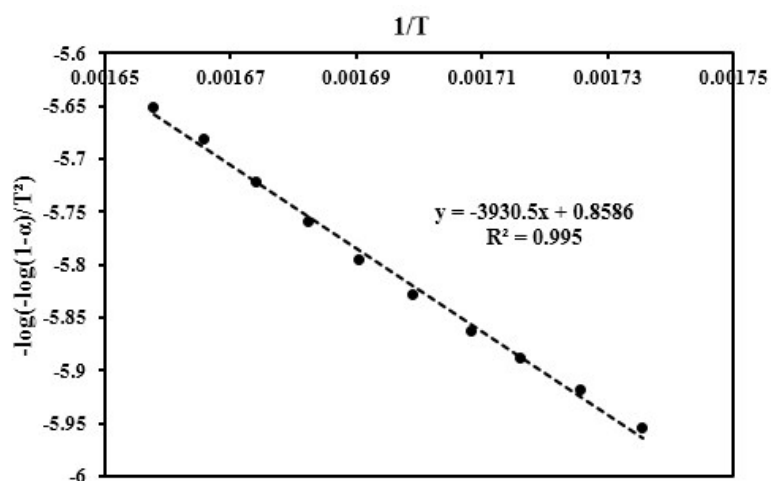

**Figure S2**  $-\log(-\log(1-\alpha)/T^2)$  vs  $1/T$  plot for activation energy determination of the PVP@Gd<sub>2</sub>O<sub>3</sub>:Eu<sup>3+</sup>.

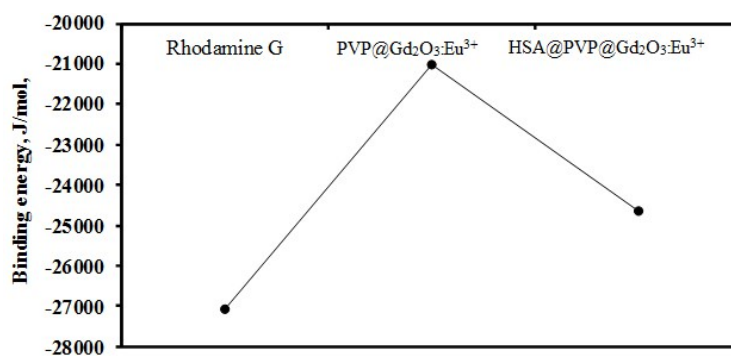

**Figure S3** Binding energies of Rhodamine G, PVP@Gd<sub>2</sub>O<sub>3</sub>:Eu<sup>3+</sup> and HSA@PVP@Gd<sub>2</sub>O<sub>3</sub>:Eu<sup>3+</sup> calculated with intensities fitted in the Gibbs energy equation.

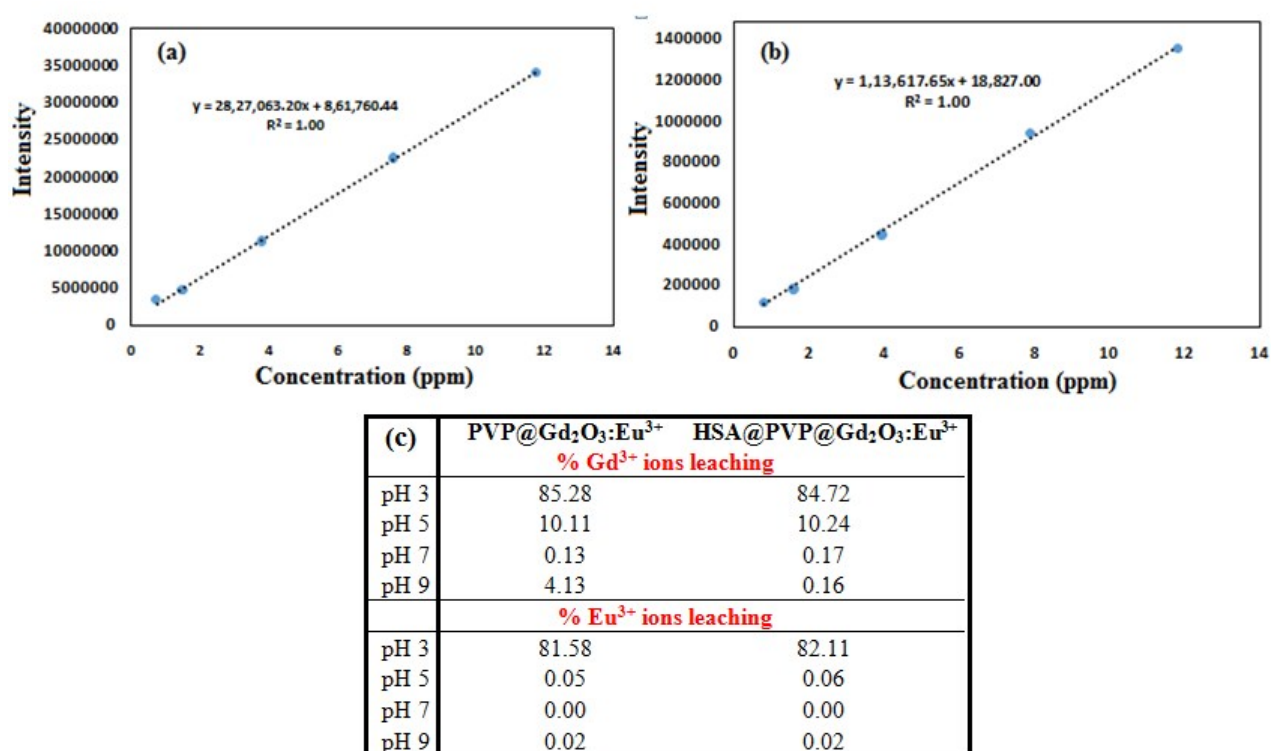

**Figure S4.** ICP-OES calibration plots of: (a) Eu<sup>3+</sup> and (b) Gd<sup>3+</sup> ions (c) % leaching of Gd<sup>3+</sup> and Eu<sup>3+</sup> ions from NPs when dispersed at different pH as obtained from ICP-OES analysis.

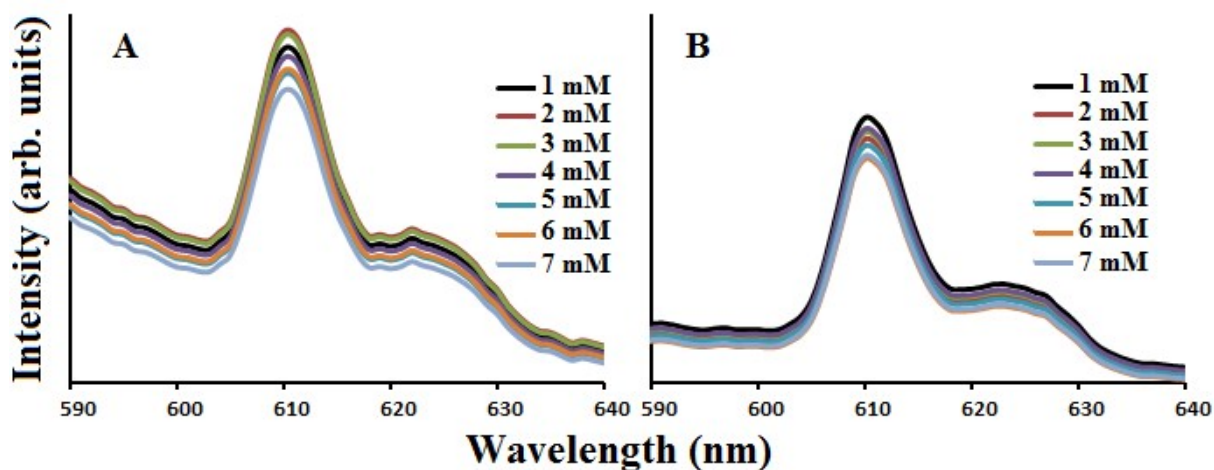

**Figure S5.** Fluorescence spectra of (A) PVP@Gd<sub>2</sub>O<sub>3</sub>:Eu<sup>3+</sup> NPs and (B) HSA@PVP@Gd<sub>2</sub>O<sub>3</sub>:Eu<sup>3+</sup> NPs; dispersed in aq. NaCl of different ionic strength.

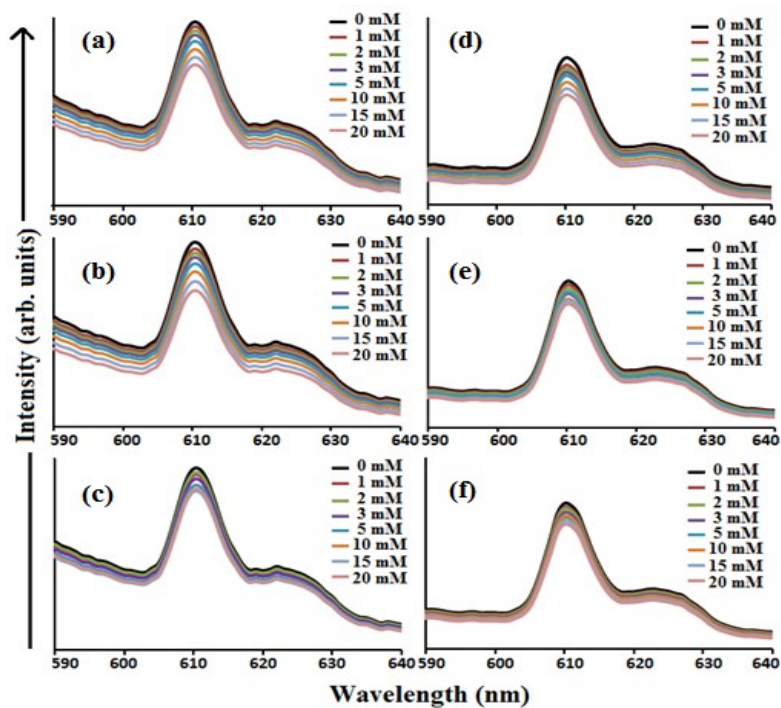

**Figure S6.** Fluorescence spectra of PVP@Gd<sub>2</sub>O<sub>3</sub>:Eu<sup>3+</sup> NPs dispersed in different concentrations of aq. (a) DTAB (b) SDS and (c) Tween 20; and fluorescence spectra of HSA@PVP@Gd<sub>2</sub>O<sub>3</sub>:Eu<sup>3+</sup> NPs dispersed in different concentrations of aq. (d) DTAB (e) SDS and (f) TWEEN 20.

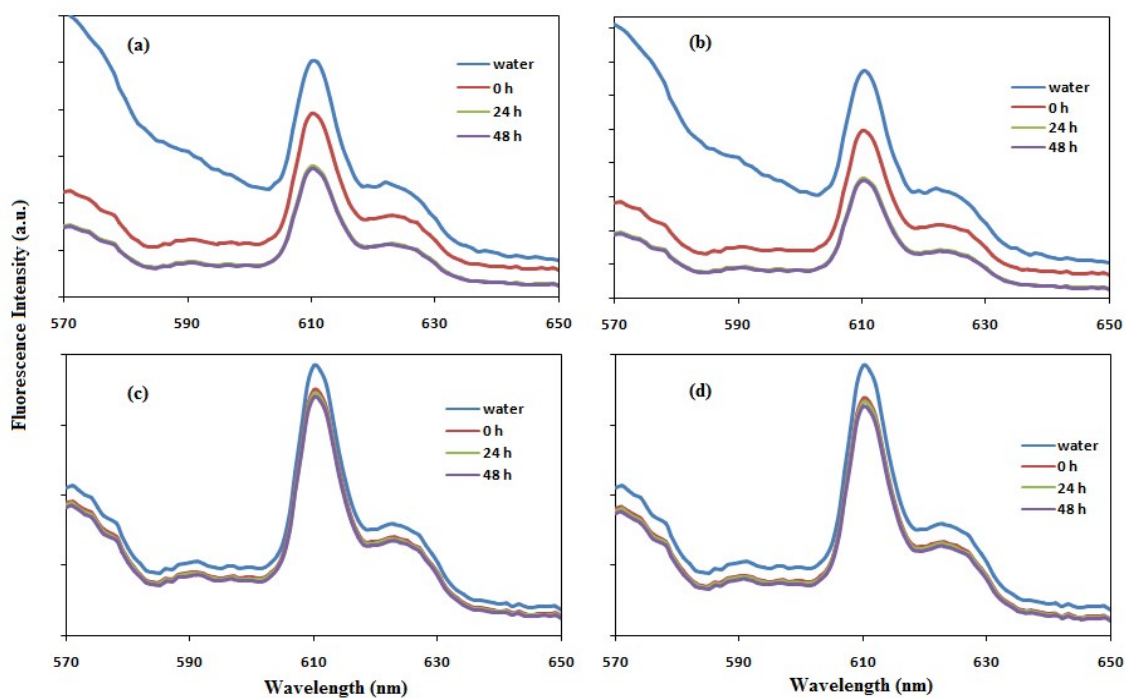

**Figure S7.** Time dependent fluorescence spectra of PVP@Gd<sub>2</sub>O<sub>3</sub>:Eu<sup>3+</sup> NPs dispersed in (a) DMEM (b) RPMI; and HSA@PVP@Gd<sub>2</sub>O<sub>3</sub>:Eu<sup>3+</sup> NPs dispersed in (c) DMEM (d) RPMI.

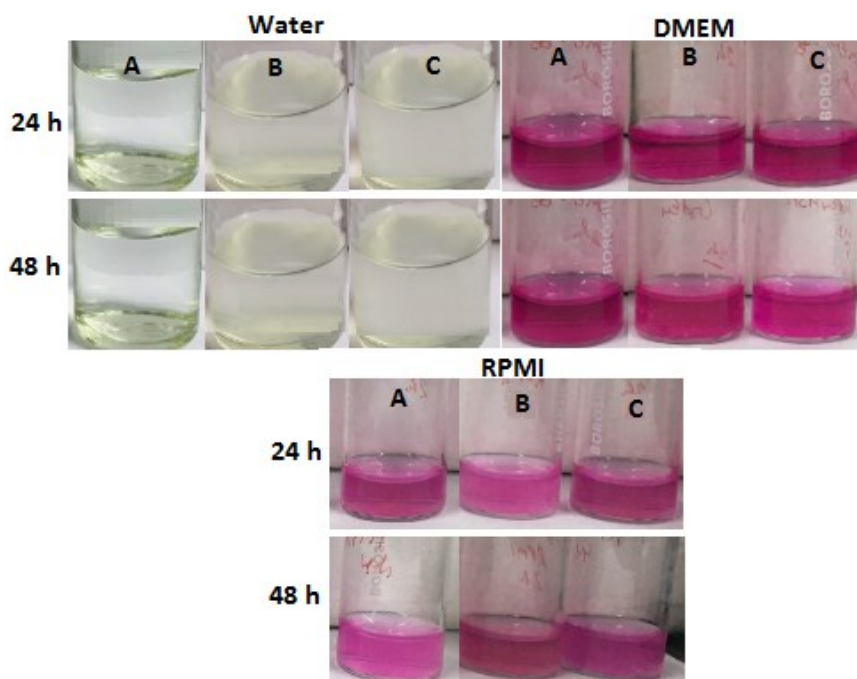

**Figure S8.** Colloidal stability study: Digital images of (A) blank (B) PVP@Gd<sub>2</sub>O<sub>3</sub>:Eu<sup>3+</sup> and (C) HSA@PVP@Gd<sub>2</sub>O<sub>3</sub>:Eu<sup>3+</sup> NPs after incubation in different biological media for 48 h.



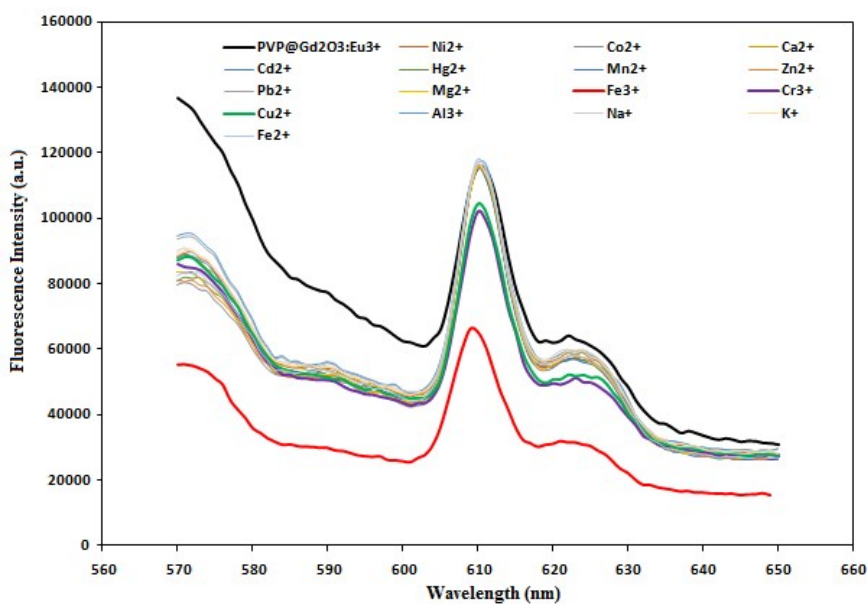

**Figure S9.** Fluorescence spectra of aq. dispersed PVP@Gd<sub>2</sub>O<sub>3</sub>:Eu<sup>3+</sup> NPs in presence of various metal ions of 3.33 ppm concentration.

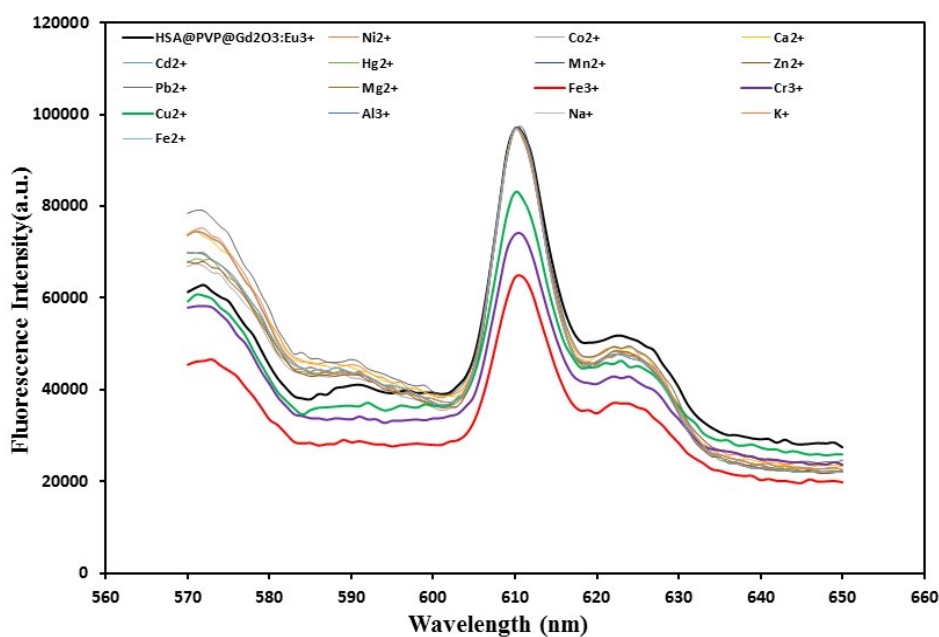

**Figure S10.** Fluorescence spectra of aq. dispersed HSA@PVP@Gd<sub>2</sub>O<sub>3</sub>:Eu<sup>3+</sup> NPs in presence of various metal ions of 3.33 ppm concentration.



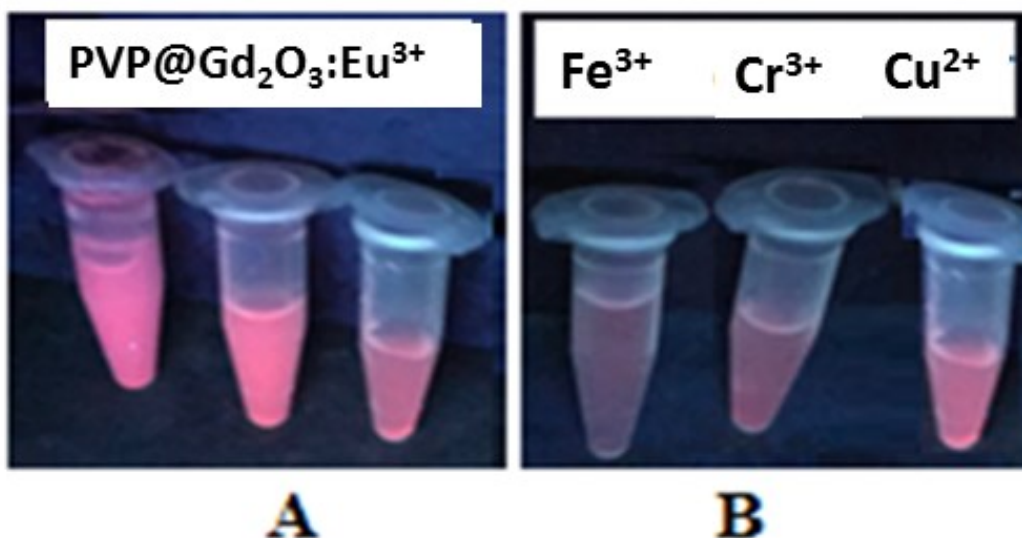

**Figure S11.** Fluorescence of aqueous dispersed PVP@Gd<sub>2</sub>O<sub>3</sub>:Eu<sup>3+</sup> NPs of different concentration (B) fluorescence of aqueous dispersed PVP@Gd<sub>2</sub>O<sub>3</sub>:Eu<sup>3+</sup> NPs in presence of metal ions, after being excited by 260 nm UV light.

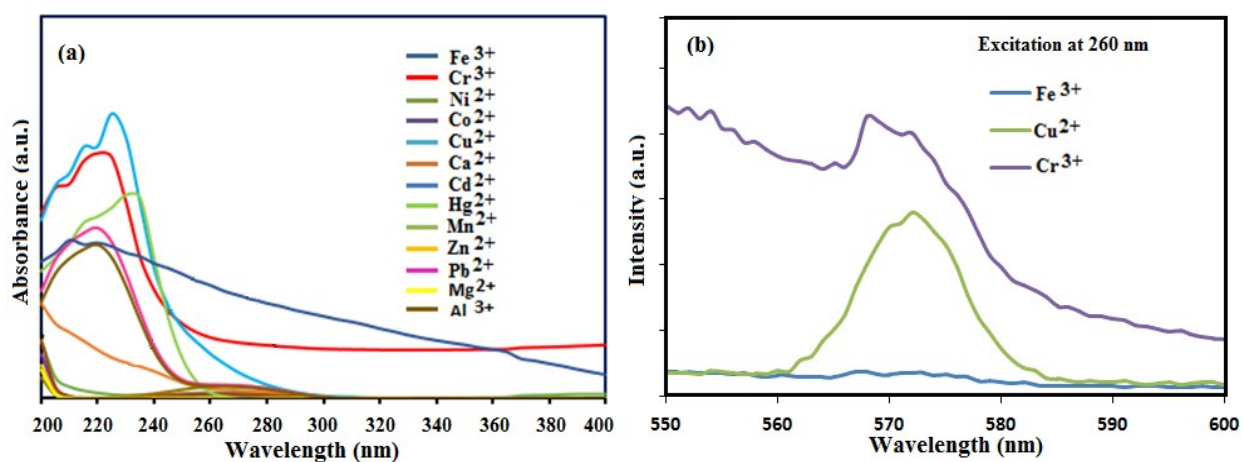

**Figure S12** (a) absorbance spectra and (b) Emission spectra of metal ions.

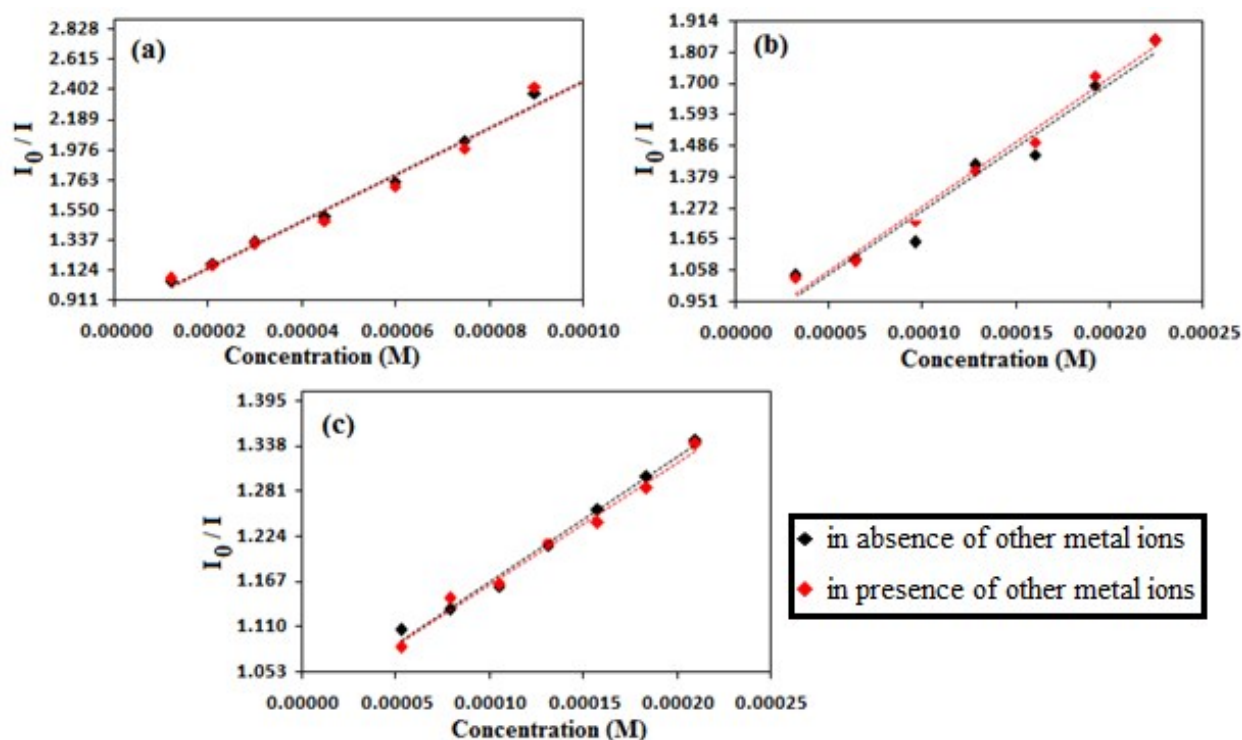

**Figure S13.** Stern–Volmer plots of aqueous dispersed PVP@Gd<sub>2</sub>O<sub>3</sub>:Eu<sup>3+</sup> NPs : (a)  $I_0/I$  vs. [Fe<sup>3+</sup>] in absence and presence of (3.33 ppm Cr<sup>3+</sup> and Cu<sup>2+</sup> ions) (b)  $I_0/I$  vs. [Cr<sup>3+</sup>] in absence and presence of (3.33 ppm Fe<sup>3+</sup> and Cu<sup>2+</sup> ions) and (c)  $I_0/I$  vs. [Cu<sup>2+</sup>] in absence and presence of (3.33 ppm Fe<sup>3+</sup> and Cr<sup>3+</sup> ions).

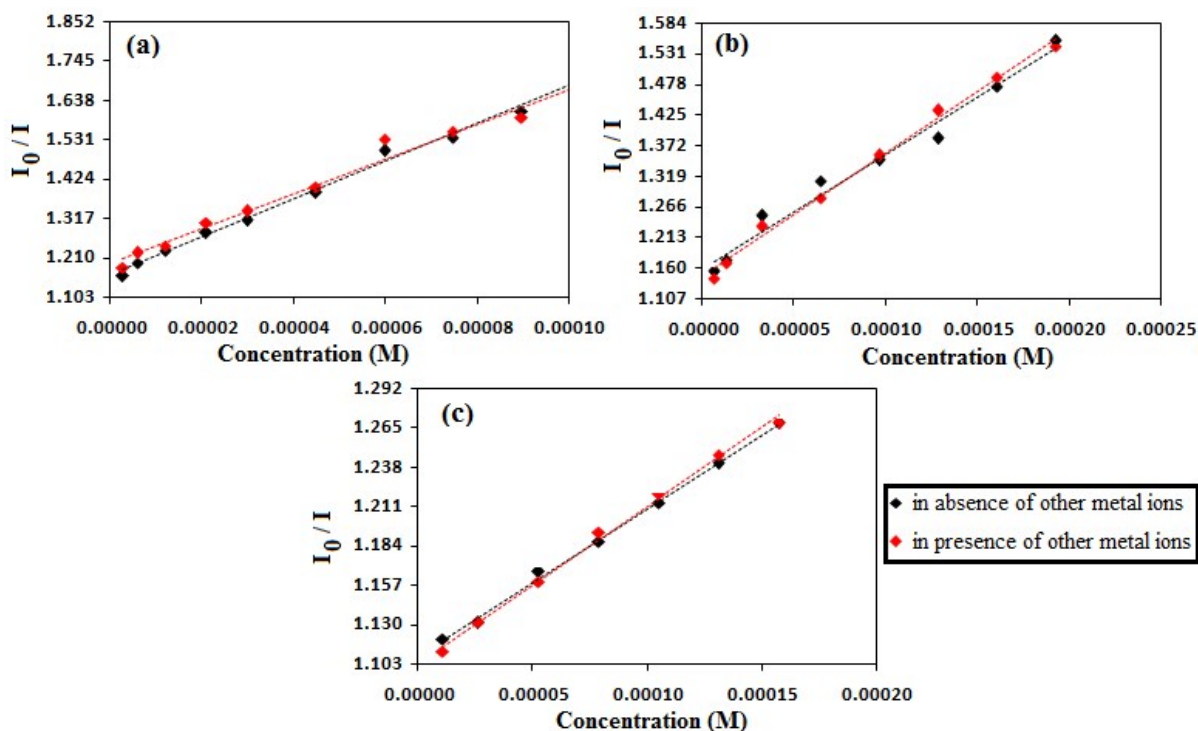

**Figure S14.** Stern–Volmer plots of aqueous dispersed HSA@PVP@Gd<sub>2</sub>O<sub>3</sub>:Eu<sup>3+</sup> NPs: (a) I<sub>0</sub>/I vs. [Fe<sup>3+</sup>] in absence and presence of (0.667 ppm Cr<sup>3+</sup> and Cu<sup>2+</sup> ions) (b) I<sub>0</sub>/I vs. [Cr<sup>3+</sup>] in absence and presence of (0.667 ppm Fe<sup>3+</sup> and Cu<sup>2+</sup> ions) and (c) I<sub>0</sub>/I vs. [Cu<sup>2+</sup>] in absence and presence of (0.667 ppm Fe<sup>3+</sup> and Cr<sup>3+</sup> ions).

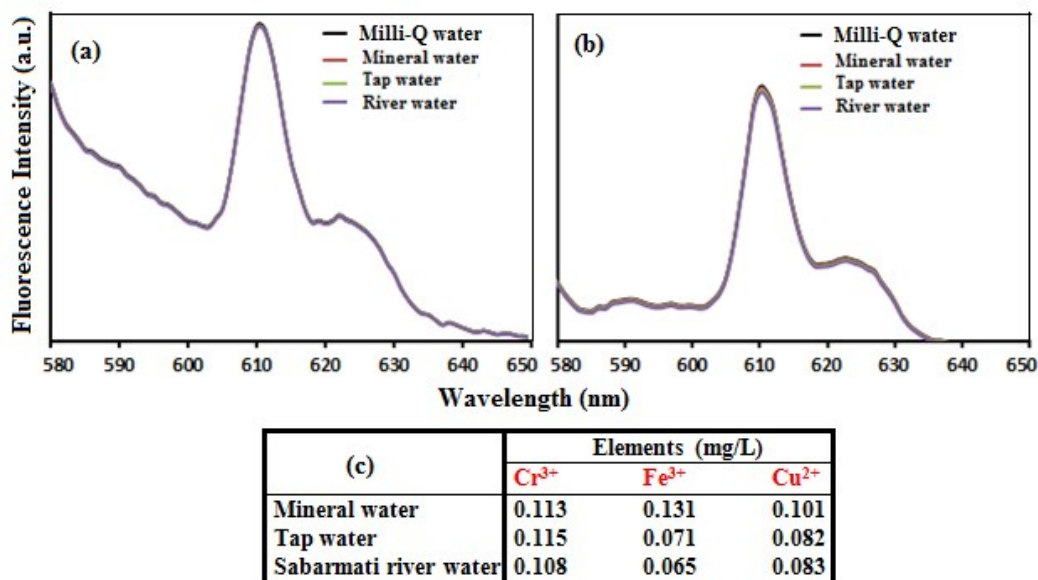

**Figure S15.** Fluorescence of (a) PVP@Gd<sub>2</sub>O<sub>3</sub>:Eu<sup>3+</sup> NPs (b) HSA@PVP@Gd<sub>2</sub>O<sub>3</sub>:Eu<sup>3+</sup> NPs dispersed in different real water samples (c) ICP-OES analysis of real water samples.
